# Supplementary material for: Association of education level with diabetes prevalence in Latin American cities and its modification by city social environment
Source: HighWire-hosted journal article supplement (doi:10.1136/jech-2020-216116), 2021-02-04
Supplement: jech-2020-216116supp001_data_supplement.pdf [file jech-2020-216116supp001_data_supplement.pdf]

**Supplementary table 1: Characteristics of the national surveys included in our sample.**

| Country     | Survey                                                                                                                                                                                                                            | Sample Characteristics                                                                                                                                               | Sampling Strategy                                                                                                                                                                                                                                                                   | Representation                                                                                                                                                |
|-------------|-----------------------------------------------------------------------------------------------------------------------------------------------------------------------------------------------------------------------------------|----------------------------------------------------------------------------------------------------------------------------------------------------------------------|-------------------------------------------------------------------------------------------------------------------------------------------------------------------------------------------------------------------------------------------------------------------------------------|---------------------------------------------------------------------------------------------------------------------------------------------------------------|
| Argentina   | Country: Argentina<br>Survey: Encuesta Nacional de Factores de Riesgo, ENFR (National Risk Factors Survey)                                                                                                                        | Age: >18 years<br>Total N: 32,365<br>N in SALURBAL: 21,451<br>N ≥ 25 <sup>a</sup> : 18,479<br>Year: 2013                                                             | Multistage [Aglomerado censal: área (groups of radio censales); household; person 18 years or older]<br>Stratified [population size; education level of head of household]                                                                                                          | National, four <i>localidad</i> groups based on size, 6 regions, 23 provinces, Ciudad Autónoma de Buenos Aires, and 8 metropolitan areas >500,000 population. |
| Brazil      | Country: Brasil<br>Survey: Pesquisa Nacional de Saúde, PNS (National Health Survey)                                                                                                                                               | Age: All ages<br>Total N: 64,308 adults 18+ years<br>N in SALURBAL: 29,353 adults 18+ years<br>N ≥ 25 <sup>a</sup> : 30,425<br>Year: 2013                            | Multistage [census tracts or groups of census tracts; households; person 18 years or older]<br>Stratified [capital city, metropolitan region, or integrated economic development region, then rest of municipalities; Urban/rural; total household income]                          | Regions (5) States or federation units (27), state capitals (27), urban and rural, metropolitan areas and development integrated areas                        |
| Chile       | Country: Chile<br>Survey: Encuesta Nacional de Salud, ENS (National Health Survey)                                                                                                                                                | Age: ≥15 years<br>Total N: 5,293<br>N in SALURBAL: 2,840<br>N ≥ 25 <sup>a</sup> : 2,405<br>Year: 2010                                                                | Multistage [Comunas; Segments within comunas; household; person 15 years or older]<br>Stratified [urban/rural with three groups of population sizes]                                                                                                                                | National, Regions (15), urban/rural                                                                                                                           |
| Colombia    | Country: Colombia<br>Survey: Encuesta Nacional de Salud, ENS (National Health Survey)                                                                                                                                             | Age: 0 - 69 years<br>Total N: 102,677 (41,281 adults 18-69 years)<br>N in SALURBAL: 43,182 (18,824 adults 18-69 years)<br>N ≥ 25 <sup>a</sup> : 15,221<br>Year: 2007 | Multistage [Municipalities or combination of municipalities if small; Manzanas; household; person adults 18-69 and all children 17 and under]<br>Stratified [region; urbanization of municipal seats; urban/rural municipal population; unsatisfied basic needs]                    | Region, department, subregion, urban area of municipal capitals, urban/rural, by poverty level                                                                |
| Mexico      | Country: Mexico<br>Survey: Encuesta Nacional de Salud y Nutrición, ENSANUT (National Survey for Health and Nutrition)                                                                                                             | Age: all ages<br>Total N: 46,277 adults 18+ years [2012]<br>N in SALURBAL: 26,335 adults 18+ years [2012]<br>(2012) N ≥ 25 <sup>a</sup> : 23,389<br>Years: 2012      | Multistage [AGEB; Manzana (urban) or pseudo-manzanas with localidades (rural); Households; 1 person within each of the groups (0-4 years, 5-9 years, 10-19 years, 20 years and older, recent medical service user)]<br>Stratified [socioeconomic status of AGEB at the state level] | National, state, metropolitan areas, urban/rural, high/low SES                                                                                                |
| Panama      | Country: Panama<br>Survey: Encuesta Nacional de Salud y Calidad de Vida ENSCAVI (National Survey of Health and Quality of Life)                                                                                                   | Age: ≥18 years<br>Total N: 25,748<br>N in SALURBAL: 11,394<br>N ≥ 25 <sup>a</sup> : 9,234<br>Years: 2007                                                             | Multistage [Census segments; Dwellings; Persons ≥18 years]<br>Stratified [Indigenous population in province; Urban/rural]                                                                                                                                                           | National, District                                                                                                                                            |
| Peru        | Country: Peru<br>Survey: Encuesta Nacional de Demografía y Salud, ENDES (National Survey of Demographics and Health)                                                                                                              | Age: All ages<br>Total N: 122,368 (adults 18+ years N=32158)<br>N in SALURBAL: 12,597 adults 18+ years<br>N ≥ 25 <sup>a</sup> : 10,012<br>Year: 2016                 | Multistage [Conglomerado (set of census blocks – urban) or Empadronamiento (set of households – rural); Households; One person within each of the groups (>15 years, females 15-49 years, children <5 years, children <12 years)]<br>Stratified [Department; Urban/Rural]           | National, Urban National, Rural National, Natural Region: Lima Metropolitan area, coast/mountain/jungle                                                       |
| El Salvador | Country: El Salvador<br>Survey: Encuesta Nacional de Enfermedades Crónicas no transmisibles en Población Adulta de El Salvador ENECA (National Survey of Noncommunicable Chronic Diseases in the Adult Population of El Salvador) | Age: ≥20 years<br>Total N: 4,817<br>N in SALURBAL: 1,5496<br>N ≥ 25 <sup>a</sup> : 1,333<br>Year: 2014-2015                                                          | Two-stage [Segmento censal, groups of dwellings (compacto); all household members 20 years and older]                                                                                                                                                                               | National, Urban National, Rural                                                                                                                               |

a.- N ≥ 25 = individuals included in the analysis comprised of adults 25 and older with complete data for age, education level, and diabetes diagnosis.

**Supplementary table 2: City and individual-level characteristics by diabetes status.**

|                                                           | Overall             | Diabetes: Yes       | Diabetes: No        | P value |
|-----------------------------------------------------------|---------------------|---------------------|---------------------|---------|
| <b>City-level characteristics</b>                         |                     |                     |                     |         |
| City-SEI                                                  | 0.28 (-0.14,0.46)   | 0.31 (-0.09,0.46)   | 0.28 (-0.14,0.46)   | <0.001  |
| <b>SEI components</b>                                     |                     |                     |                     |         |
| % households with piped water                             | 89.93 (81.21,95.02) | 90.82 (81.33,95.34) | 89.90 (81.21,95.02) | <0.001  |
| % households with sewage network                          | 78.31 (54.73,88.03) | 77.83 (54.71,88.01) | 78.31 (54.70,88.01) | 0.032   |
| % household with overcrowding                             | 3.42 (2.14,6.04)    | 3.74 (2.22,6.30)    | 3.44 (2.13,6.02)    | 0.038   |
| % population 25 and older with at least primary education | 79.03 (72.91,84.34) | 79.60 (72.91,84.42) | 79.01 (72.92,84.30) | <0.001  |
| <b>Individual-level characteristics</b>                   |                     |                     |                     |         |
| Number of survey respondents                              | 110,498             | 8,841               | 101,657             | <0.001  |
| Age                                                       | 43 (34,56)          | 59 (49,68)          | 42 (33,55)          | <0.001  |
| Women %                                                   | 58.9                | 60.6                | 58.7                | <0.001  |
| Education                                                 |                     |                     |                     |         |
| Less than primary %                                       | 19.3                | 34.2                | 18.0                | <0.001  |
| Primary %                                                 | 33.2                | 34.8                | 33.1                |         |
| Secondary %                                               | 32.9                | 21.2                | 33.9                |         |
| University %                                              | 14.6                | 9.8                 | 15.0                |         |
| Survey respondents per country                            |                     |                     |                     |         |
| Argentina %                                               | 16.7                | 20.4                | 16.4                | <0.001  |
| Brazil %                                                  | 27.5                | 26.5                | 27.6                |         |
| Chile %                                                   | 2.2                 | 2.5                 | 2.2                 |         |
| Colombia %                                                | 13.8                | 7.5                 | 14.3                |         |
| Mexico %                                                  | 21.2                | 29                  | 20.5                |         |
| Panama %                                                  | 8.4                 | 7.7                 | 8.4                 |         |
| Peru %                                                    | 9.1                 | 4.9                 | 9.4                 |         |
| El Salvador %                                             | 1.2                 | 1.6                 | 1.2                 |         |

We present median, 25<sup>th</sup>, and 75<sup>th</sup> unless specified otherwise. P-values were estimated using Wilcoxon test for continuous variables and chi-square test for discrete variables.

City-level SEI: Standardized sum of %of households with piped water, % of households with sewage network, %of household with overcrowding (reversed), % of households with durable walls, and % of population 25 and older with at least primary education.
